# Supplementary material for: Improved catalytic performance of porous metal–organic frameworks for the ring opening of styrene oxide
Source: Royal Society of Chemistry journal article supplement (doi:10.1039/c7ce00528h), 2017-01-01
Supplement: c7ce00528h1.pdf [file c7ce00528h1.pdf]

# ELECTRONIC SUPPORTING INFORMATION

## Improved catalytic performance of porous metal-organic frameworks for ring-opening of epoxides

Diana Julião<sup>‡</sup>, André D. S. Barbosa<sup>‡</sup>, Andreia F. Peixoto, Cristina Freire,  
Baltazar de Castro, Salete S. Balula\* and Luís Cunha-Silva\*

<sup>a</sup> *REQUIMTE/LAQV & Department of Chemistry and Biochemistry, Faculty of Sciences,  
University of Porto, 4169-007 Porto, Portugal*

\*Corresponding authors: Dr. Salete S. Balula and Dr. Luís Cunha-Silva

E-mail: [sbalula@fc.up.pt](mailto:sbalula@fc.up.pt), [l.cunha.silva@fc.up.pt](mailto:l.cunha.silva@fc.up.pt); Tel.: +351 220402576; Fax: +351220402659

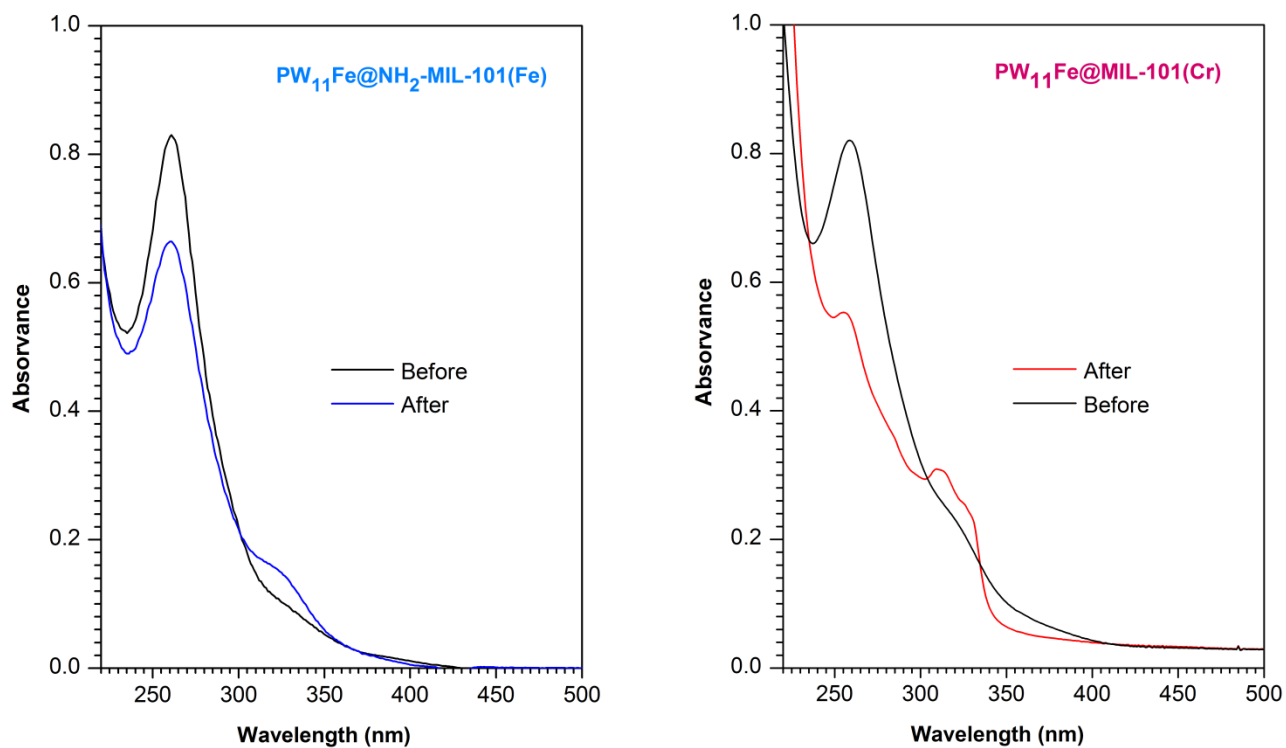

**Figure S1.** UV-Vis spectra of PW<sub>11</sub>Fe MeCN solution before encapsulation and after encapsulation in to NH<sub>2</sub>-MIL-101(Fe) (on left) and MIL-101(Cr) (on right) supports.

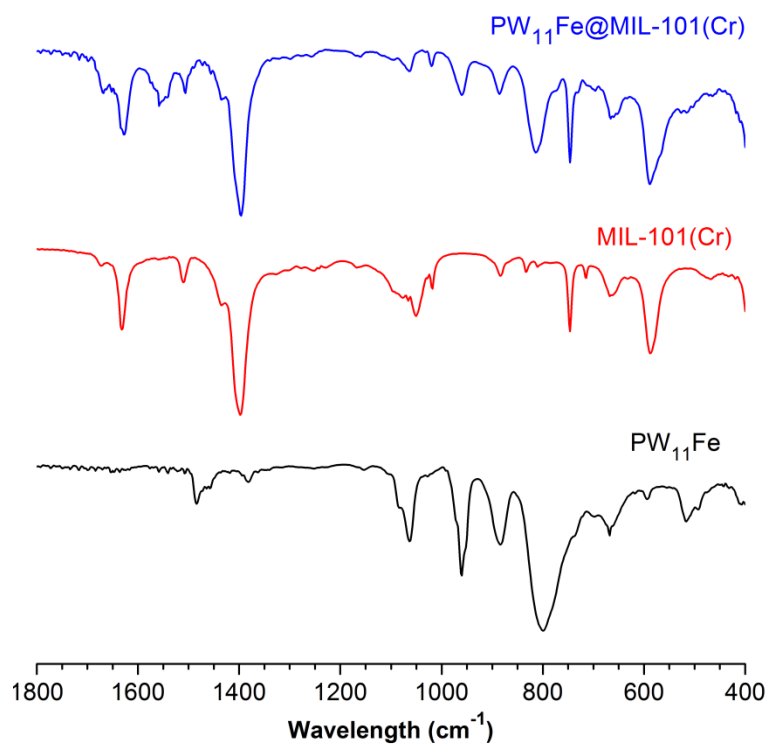

**Figure S2** FT-IR spectra of the PW<sub>11</sub>Fe, the solid support MIL-101(Cr) and the composite material PW<sub>11</sub>Fe@MIL-101(Cr).

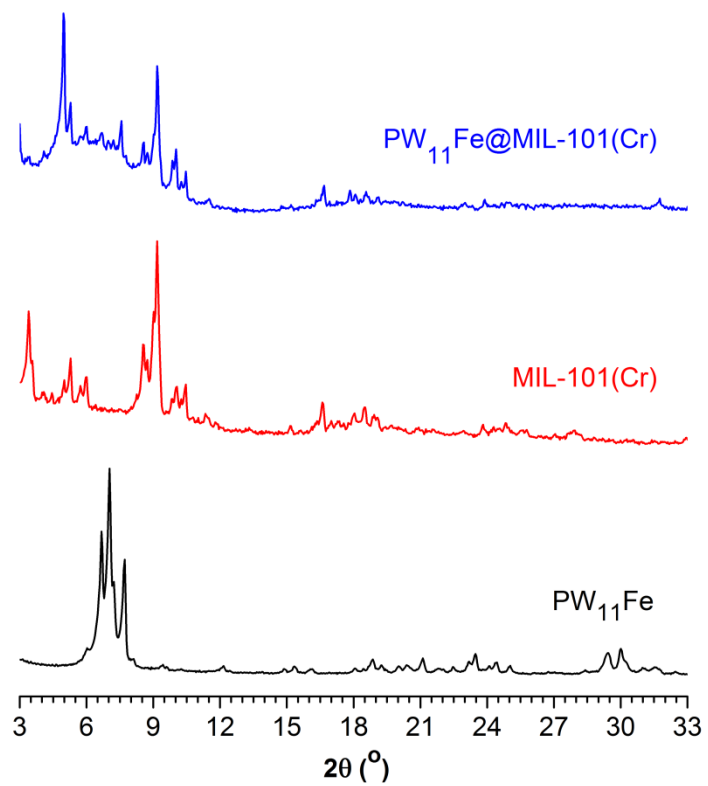

**Figure S3** Powder XRD patterns of the  $PW_{11}Fe$ , the solid support  $MIL-101(Cr)$  and the composite material  $PW_{11}Fe@MIL-101(Cr)$ .

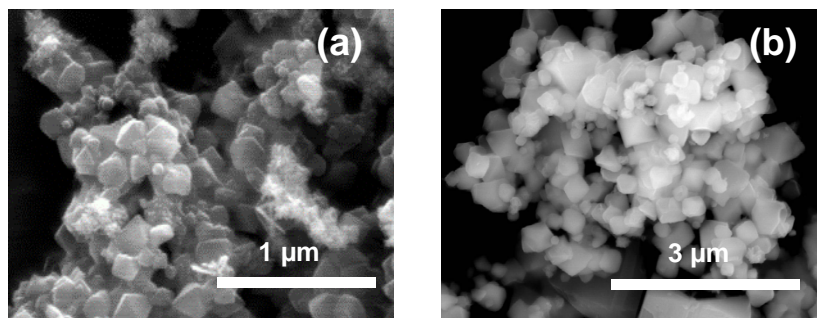

**Figure S4.** SEM images of support material MIL-101(Cr) (a) and composite material PW<sub>11</sub>Fe@MIL-101(Cr) (b).

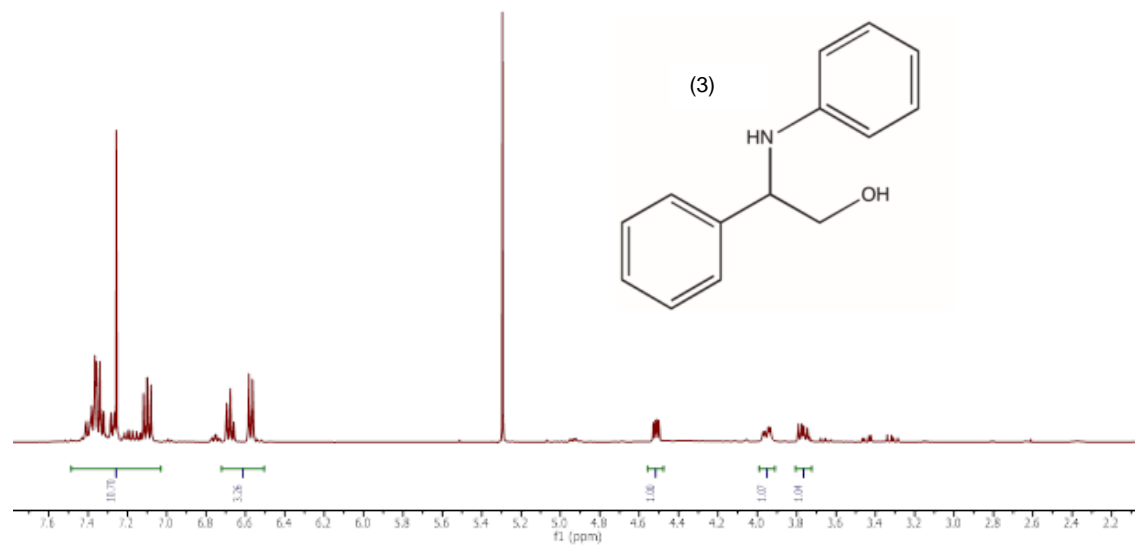

**Figure S5.** <sup>1</sup>H NMR spectrum of isolated 2-phenylamino-2-phenyl-ethanol (isomer 3 in scheme 1).
